# Supplementary material for: Surface-modified boron nitride as a filler to achieve high thermal stability of polymer solid-state lithium-metal batteries
Source: Royal Society of Chemistry journal article supplement (doi:10.1039/d1ta05410d), 2021-01-01
Supplement: d1ta05410d1.pdf [file d1ta05410d1.pdf]

## Supplementary material

### Surface Modified Boron Nitride as A Filler to Achieve High Thermal Stability of Polymer Solid-State Lithium Metal Batteries

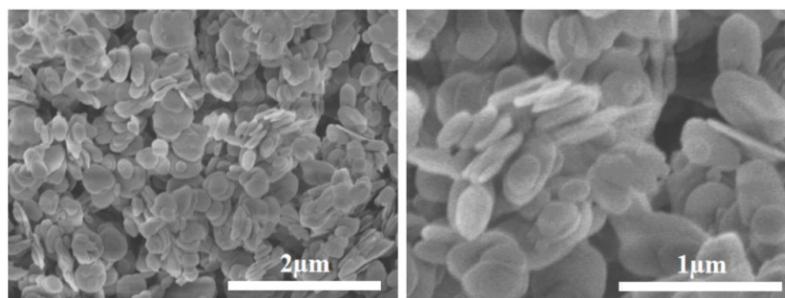

**Fig. S1.** The SEM image of BNNS.

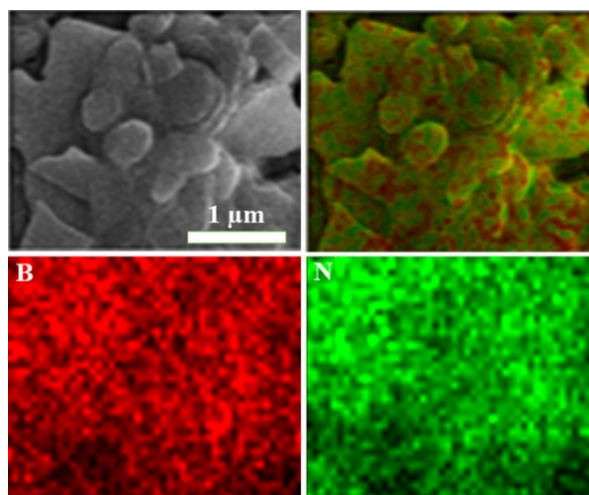

**Fig. S2.** The SEM and Elemental mapping images of BNNS.

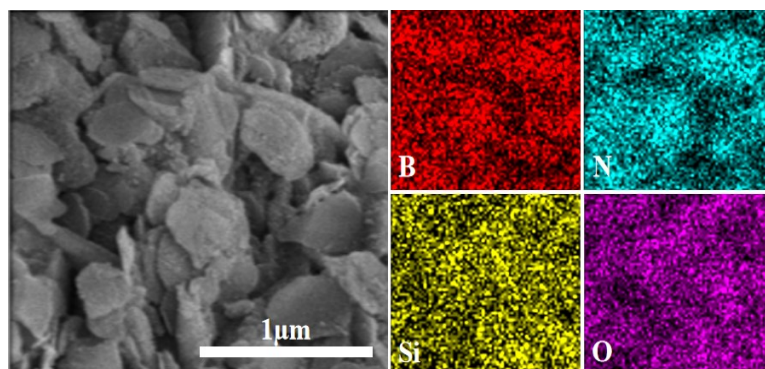

**Fig. S3.** The SEM and Elemental mapping images of  $\text{SiO}_2@\text{BNNS}$ .

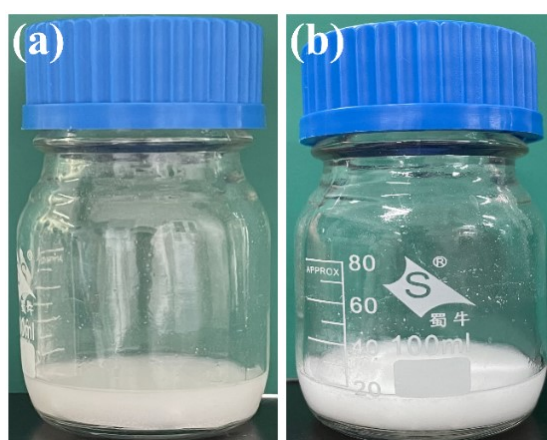

**Fig. S4.** (a) The Photograph of BNNS nanosheets dissolving in acetonitrile. (b) The Photograph of the homogeneous electrolyte solution of  $\text{SiO}_2@\text{BNNS}$ , PEO and LiTFSI in acetonitrile.

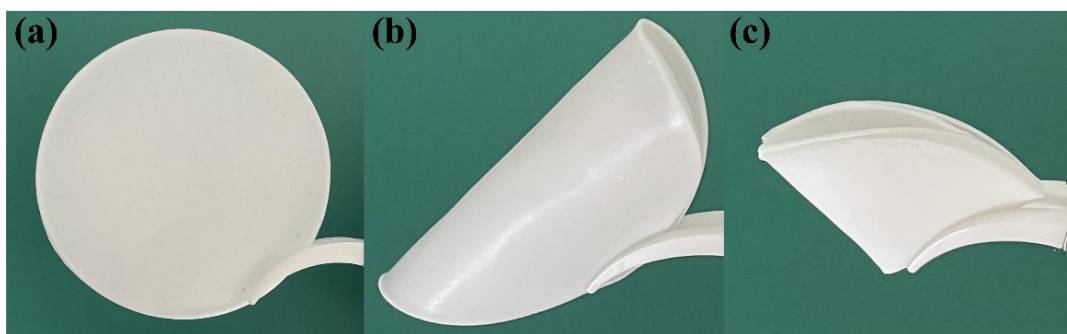

**Fig. S5.** Photograph of the 4%SiO<sub>2</sub>@BNNS CPE membrane.

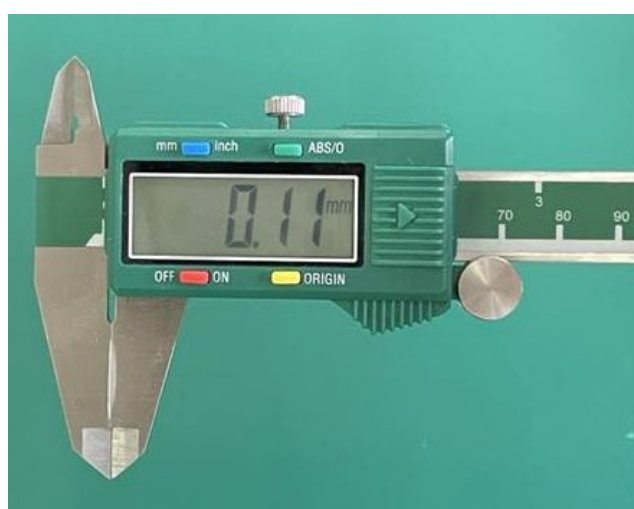

**Fig. S6.** Photograph of the thickness of PLSB CPE membrane.

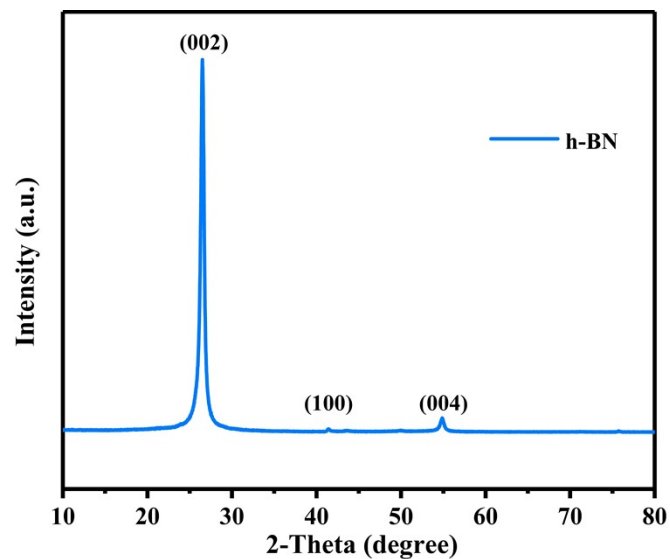

**Fig. S7.** The XRD spectra of BNNS.

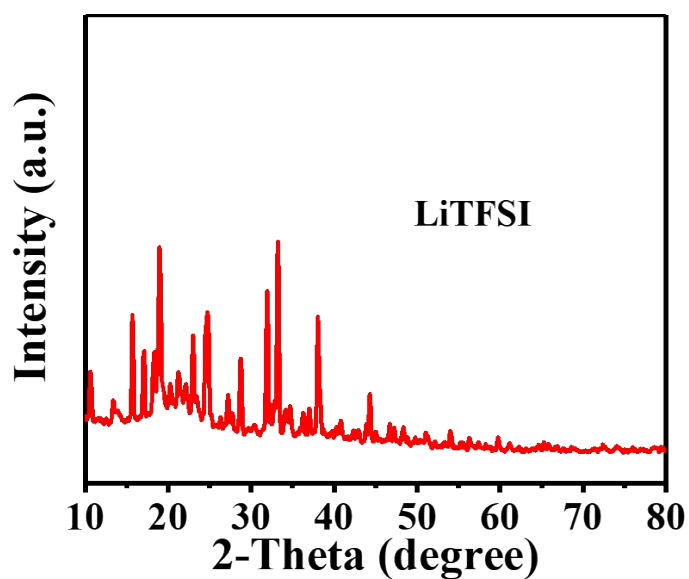

**Fig. S8.** The XRD of LiTFSI. The peaks at  $11.04^\circ$ ,  $16.03^\circ$ ,  $19.09^\circ$ ,  $20.55^\circ$ ,  $21.54^\circ$ ,  $23.32^\circ$ ,  $25.07^\circ$ ,  $27.4^\circ$ ,  $29.03^\circ$ ,  $32.20^\circ$ ,  $33.48^\circ$ ,  $38.30^\circ$  and  $44.54^\circ$  perfectly match to (002), (011), (201), (111), (202), (013), (113), (212), (114), (015), (115), (116) and (125) crystal planes.

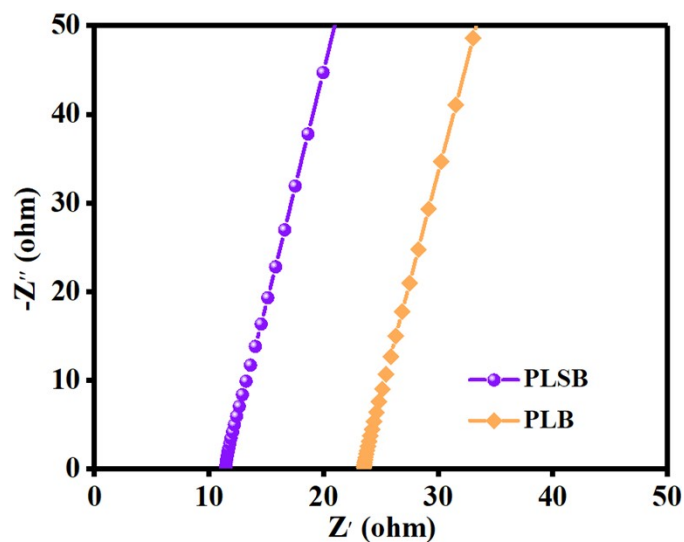

**Fig. S9.** The EIS plots of PEO/LiTFSI/SiO<sub>2</sub>@BNNS and PEO/LiTFSI/BNNS at 60°C.

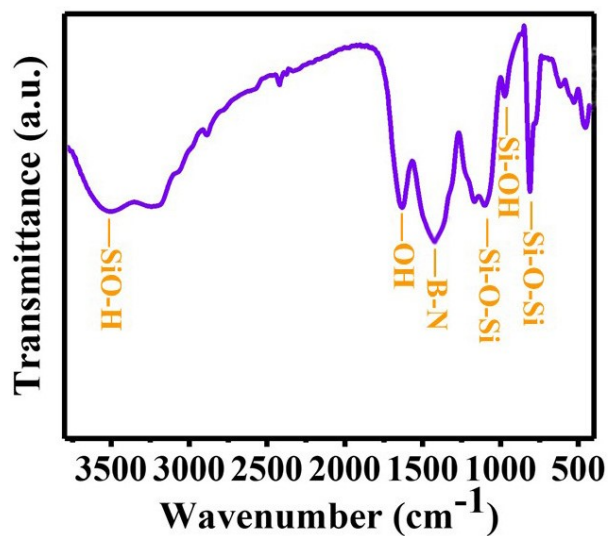

**Fig. S10.** FTIR spectra of SiO<sub>2</sub>@BNNS between 4000 and 500 cm<sup>-1</sup>.

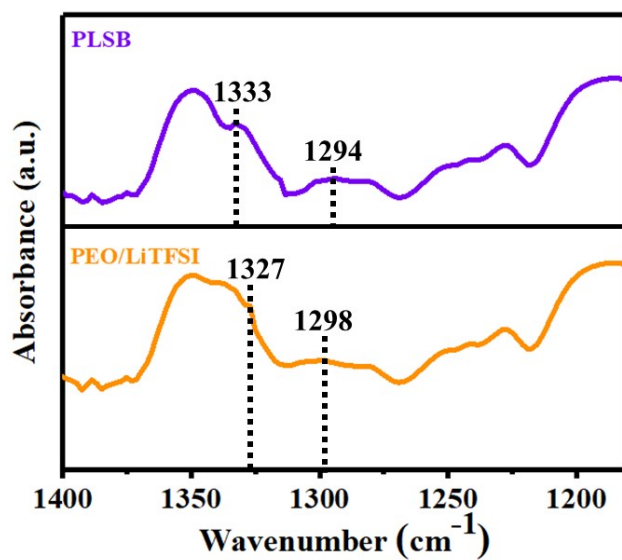

Fig. S11. FTIR spectra of PLSB and PEO/LiTFSI between 1400 and 1180  $\text{cm}^{-1}$ .

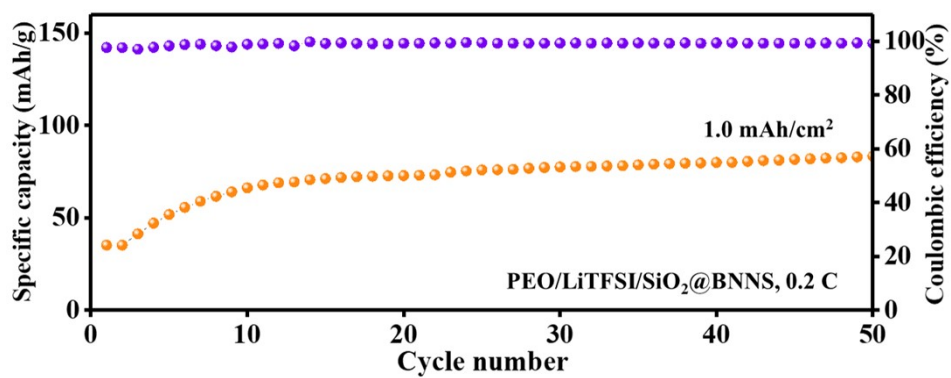

Fig. S12. Cycling performance of the solid-state  $\text{LiFePO}_4/\text{Li}$  battery using PEO/LiTFSI/SiO<sub>2</sub>@BNNS electrolyte at 60 °C and 0.2 C (1.0 mAh/cm<sup>2</sup>).

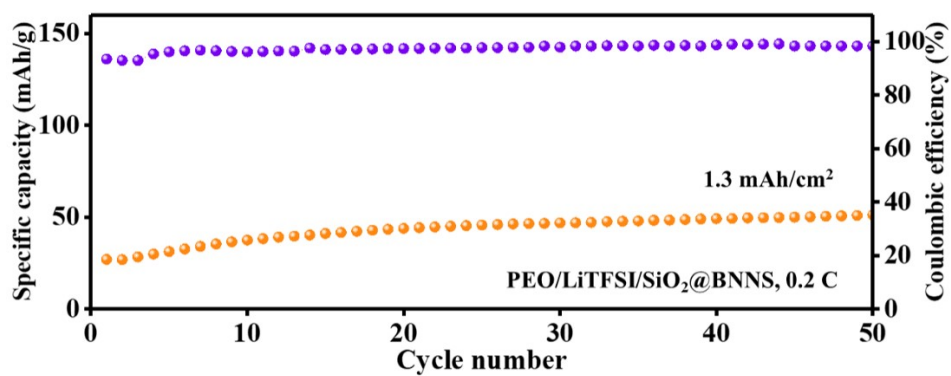

**Fig. S13.** Cycling performance of the solid-state LiFePO<sub>4</sub>/Li battery using PEO/LiTFSI/SiO<sub>2</sub>@BNNS electrolyte at 60 °C and 0.2 C (1.3 mAh/cm<sup>2</sup>).

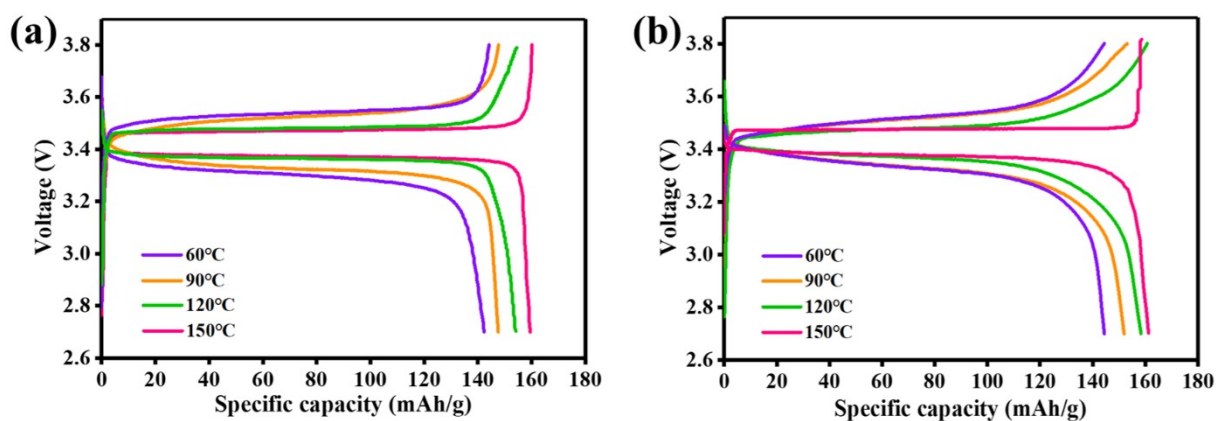

**Fig. S14.** coin(a) and pouch (b) cell typical charge–discharge curves of solid-state LiFePO<sub>4</sub>/Li battery using PEO/LiTFSI/4 wt% SiO<sub>2</sub>@BNNS electrolyte at 1 C.



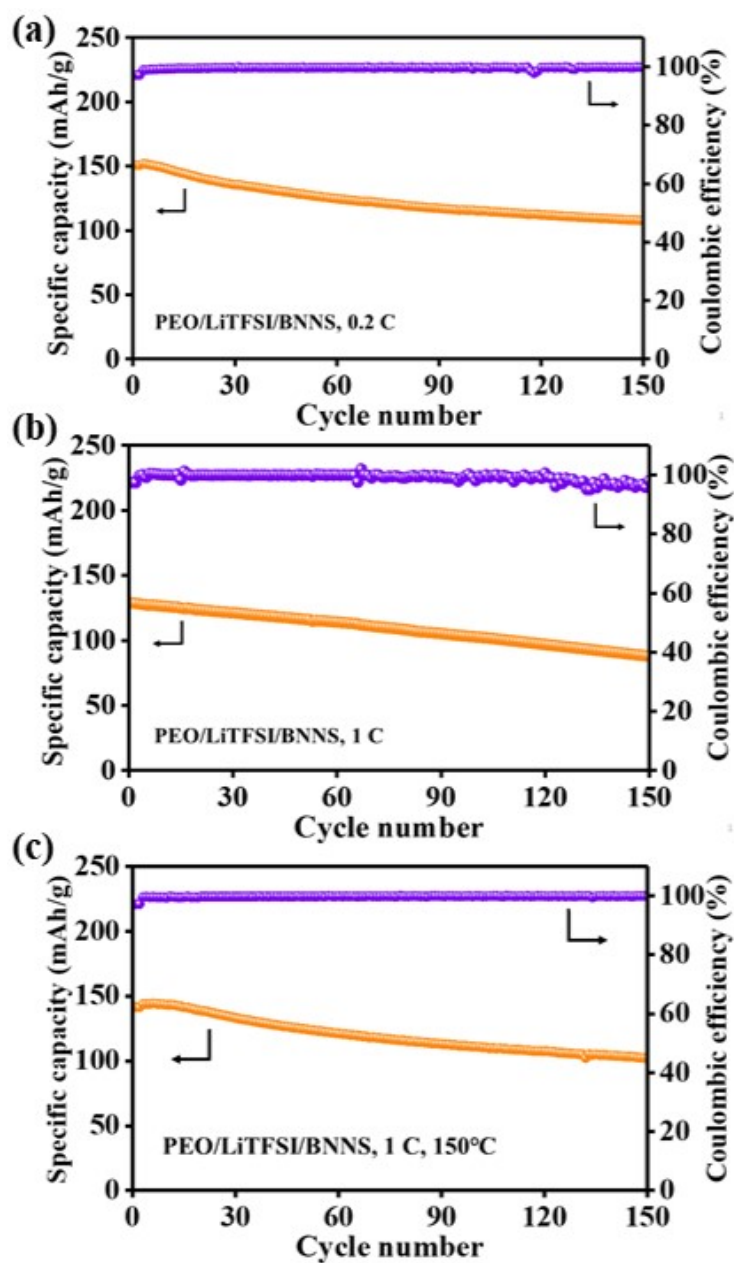

**Fig. S15.** (a) Cycling performance of the solid-state  $\text{LiFePO}_4/\text{Li}$  battery using PEO/LiTFSI/BNNS electrolyte at 60 °C and 0.2 C. (b) Cycling performance of the solid-state  $\text{LiFePO}_4/\text{Li}$  battery using PEO/LiTFSI/BNNS electrolyte at 60 °C and 1 C. (c) Cycling performance of the solid-state  $\text{LiFePO}_4/\text{Li}$  battery using PEO/LiTFSI/BNNS electrolyte at 150 °C and 1 C.

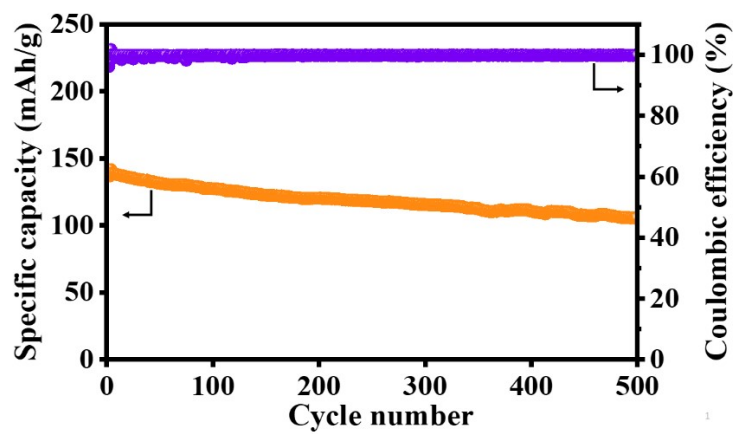

**Fig. S16.** Cycling performance of the solid-state  $\text{LiFePO}_4/\text{Li}$  battery using  $\text{PEO}/\text{LiTFSI}/\text{SiO}_2@\text{BNNS}$  electrolyte at  $150^\circ\text{C}$  and  $3\text{C}$ .
